# Supplementary material for: Identification of SLC35A1 as an essential host factor for the transduction of multi-serotype recombinant adeno-associated virus (AAV) vectors
Source: PubMed Central journal article supplement — bioRxiv. 2024 Oct 17:2024.10.16.618764. Preprint. [Version 1] doi: 10.1101/2024.10.16.618764 (PMC11507909; doi:10.1101/2024.10.16.618764), 2024-10-17
Supplement: NIHPP2024.10.16.618764v1-supplement-2.pdf [file NIHPP2024.10.16.618764v1-supplement-2.pdf]

1019

1020

1021

1022

1023

1024

1025

1026

1027

1028

1029 **Figure S1. Genes enriched in the first-round screen of mCherry-negative cells.**

1030 The x-axis represents genes targeted by the Brunello library, grouped by GO analysis.

1031 The y-axis shows the enrichment score  $[-\log_{10}]$  of each gene based on MAGeCK analysis of the

1032 sgRNA reads in gDNA<sup>Sort1</sup> vs gDNA<sup>sort0</sup> (**Table S2**). Each circle represents a gene, with its size

1033 indicating the statistical significance  $[-\log_{10}]$  of enrichment when comparing gDNA<sup>Sort1</sup> to

1034 gDNA<sup>Sort0</sup>. The color of each circle represents the function of the genes. Only genes with an

1035 enrichment score greater than  $10^4$  are shown.

1036

1037 **Figure S2. SLC35A1 KO in HAE-ALI culture.**

1038 **(A) Generation of HAE-ALI<sup>SLC35A1-KO</sup> cultures.** Human airway epithelial cell line CuFi-8

1039 cells were transduced with a gRNA/Cas9 lentivirus. The puromycin resistant cells were seeded

1040 onto Transwell inserts and differentiated at an ALI for 4 weeks. **(B) Validation of SLC35A1**

1041 **expression in HAE-ALI cultures.** Western blotting detected SLC35A1 expression in cultures

1042 derived from the scramble control but none in the cultures from *SLC35A1* KO cells.  $\beta$ -actin was

1043 detected as a loading control. **(C) Transepithelial electrical resistance (TEER) measurement.**

1044 HAE-ALI cultures, Scramble control, SLC35A1-KO, KIAA0319L-KO, and the Scramble control  
1045 treated with NA were detected for TEER values.

1046

1047 **Figure S3. SIA expression in wide-type or mutant *SLC35A1* expression HEK293<sup>SLC35A1-KO</sup>**  
1048 **cells.**

1049 HEK293<sup>SLC35A1-KO</sup> cells were mock-treated or transduced with lentiviral vectors  
1050 expressing SLC35A1 WT, T128A and  $\Delta$ C Tail mutants, as indicated, followed by selection of  
1051 blasticidin (at 10  $\mu$ g/ml) for 2 weeks. The cells were fixed with 4% PFA and then permeabilized  
1052 with 0.1% Triton X-100 for intracellular staining. Biotinylated SNA and MAL II lectins were used  
1053 to stain glycan expression in HEK293<sup>SLC35A1-KO</sup> cells. SNA (**A**) and MAL II (**B**) stained cells were  
1054 incubated with DyLight 649-conjugated streptavidin for visualization under a confocal  
1055 microscope (CSU-W1 SoRa, Nikon) at 60 $\times$ . HEK293 Scramble cells were used as a control.

1056

1057 **Table S1. A list of genes enriched in the second round (FD400210-FD400208) of the**  
1058 **sorted mCherry-negative cells and ranked by the  $-\log_{10}$  enrichment score.**

1059

1060 **Table S2. A list of genes enriched in the first round (FD400209-FD400208) of the sorted**  
1061 **mCherry-negative cells and ranked by the  $-\log_{10}$  enrichment score.**

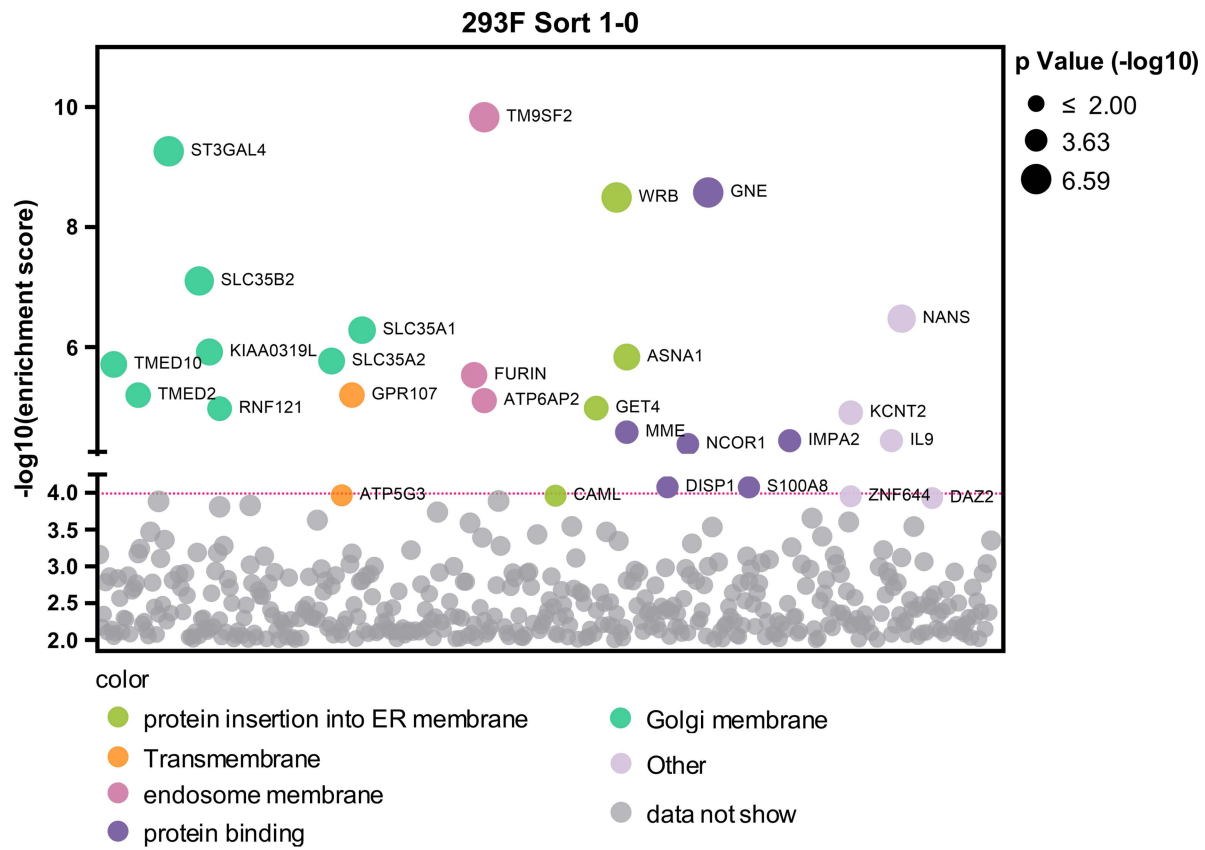

**Figure S1**

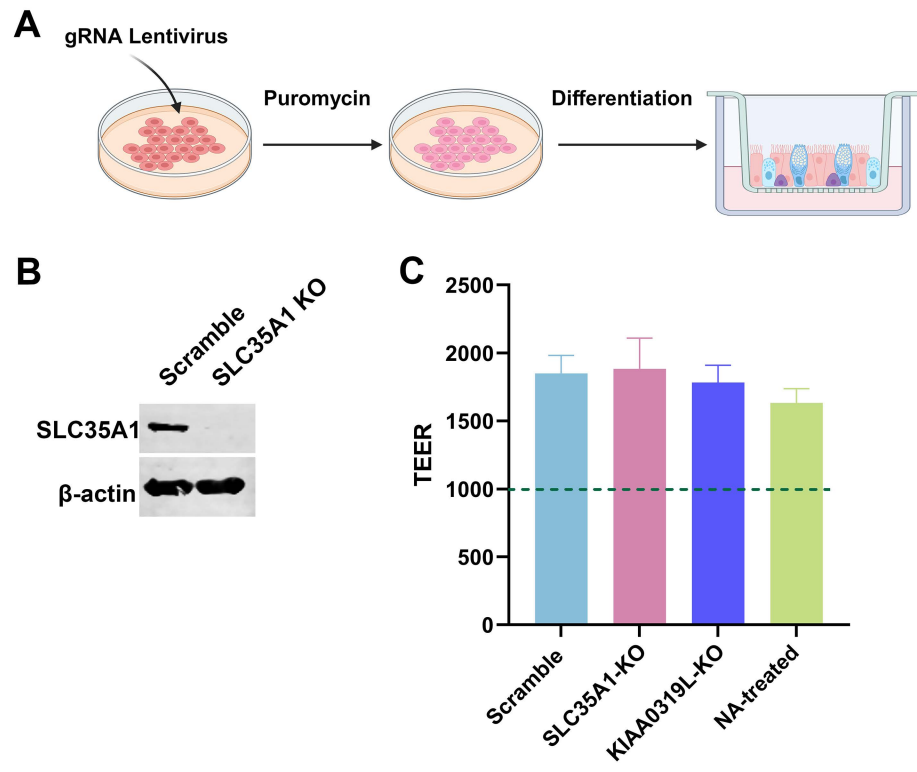

Figure S2

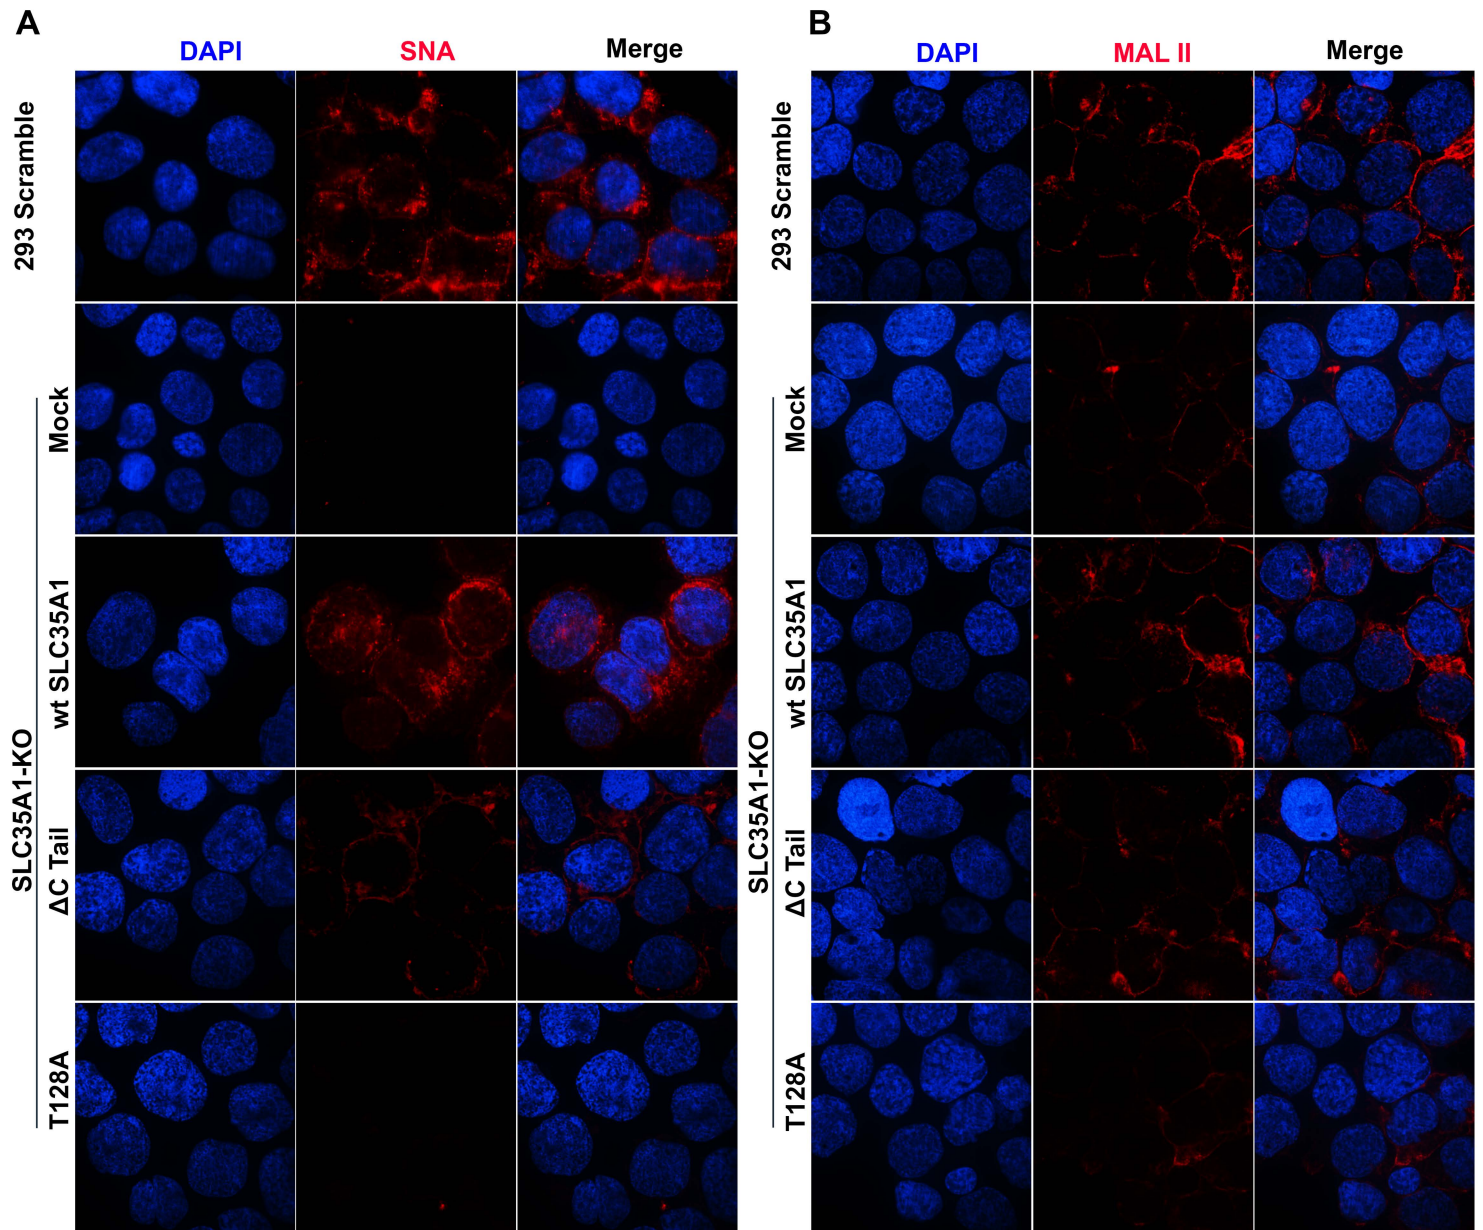

Figure S3
